# Supplementary material for: Nup2 performs diverse interphase functions in Aspergillus nidulans
Source: PubMed Central journal article supplement — Mol Biol Cell. 2018 Dec 15;29(26):3144–54. doi: 10.1091/mbc.E18-04-0223 (PMC6340215; doi:10.1091/mbc.e18-04-0223), 2018-12-15
Supplement: mbc-29-3144-s001.pdf [file mbc-29-3144-s001.pdf]

# Supplemental Materials

*Molecular Biology of the Cell*

Suresh et al.

## Supplementary Figure S1

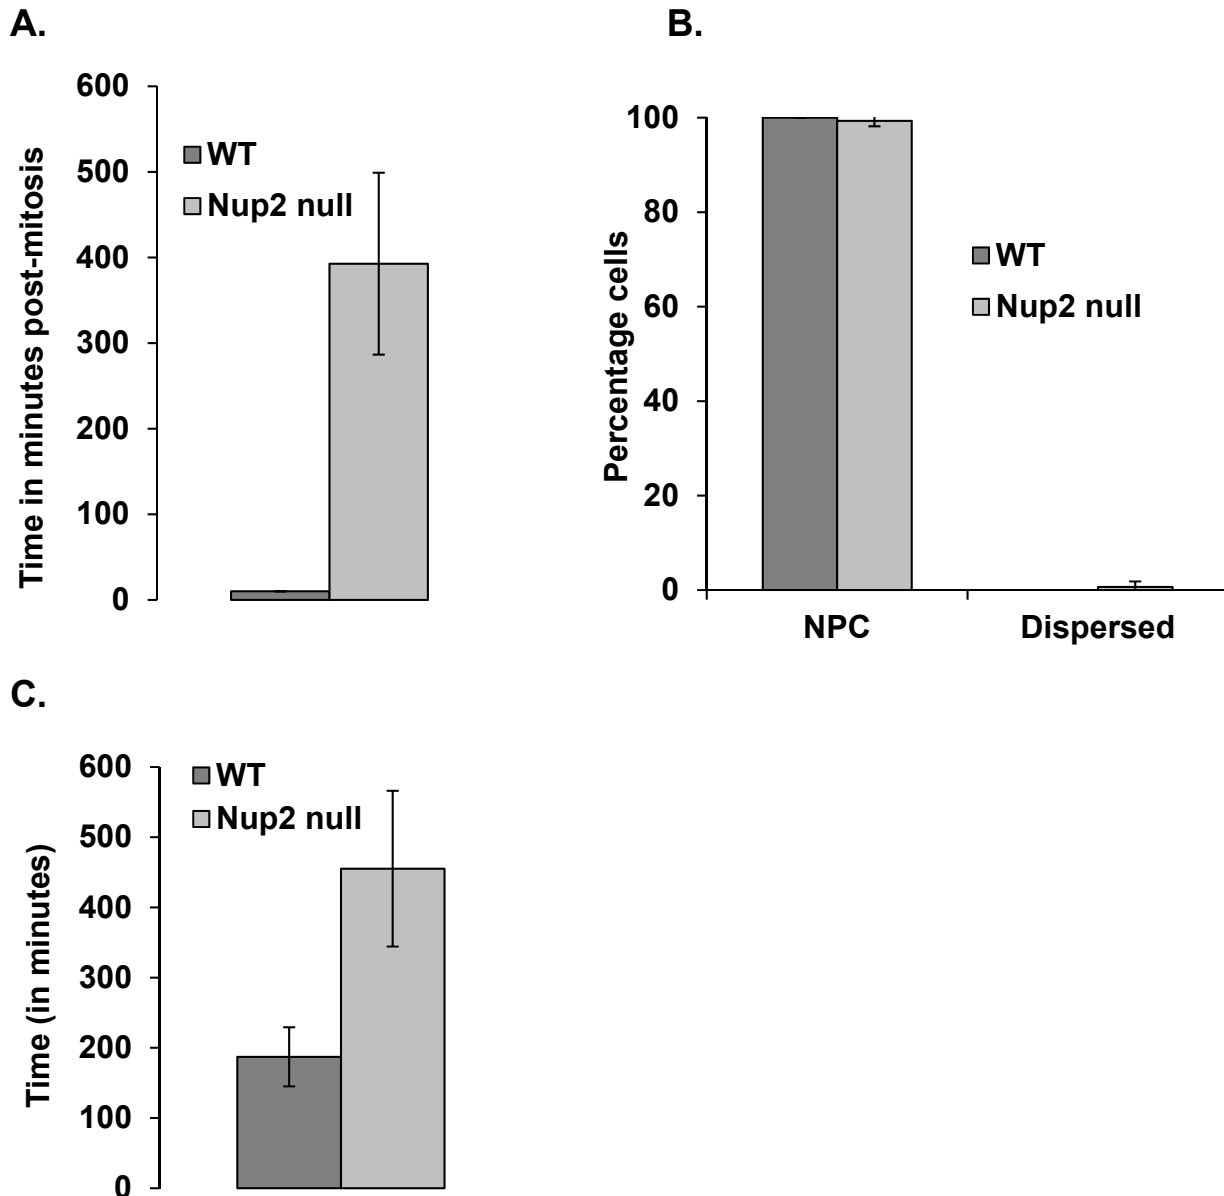

**Supplementary Figure S1. Mlp1 gets incorporated into NPCs after a prolonged interphase in Nup2-deleted cells.** (A) Time taken for Mlp1 to be incorporated into NPCs post-mitosis was calculated in wildtype and Nup2-deleted cells (n = 20 mitoses. p-value <0.0001). (B) Percentage cells with Mlp1 either at NPCs or dispersed just before mitosis was calculated in wildtype and Nup2-deleted cells (n = 20 mitosis) indicating that Mlp1 comes back to NPCs in most cases before mitosis. (C) Time spent in interphase was calculated by following NLS-dsRed and recording the time between its mitotic dispersal from nuclei in wildtype and Nup2-deleted cells (n = 50 mitosis. p-value <0.0001).

## Supplementary Figure S2

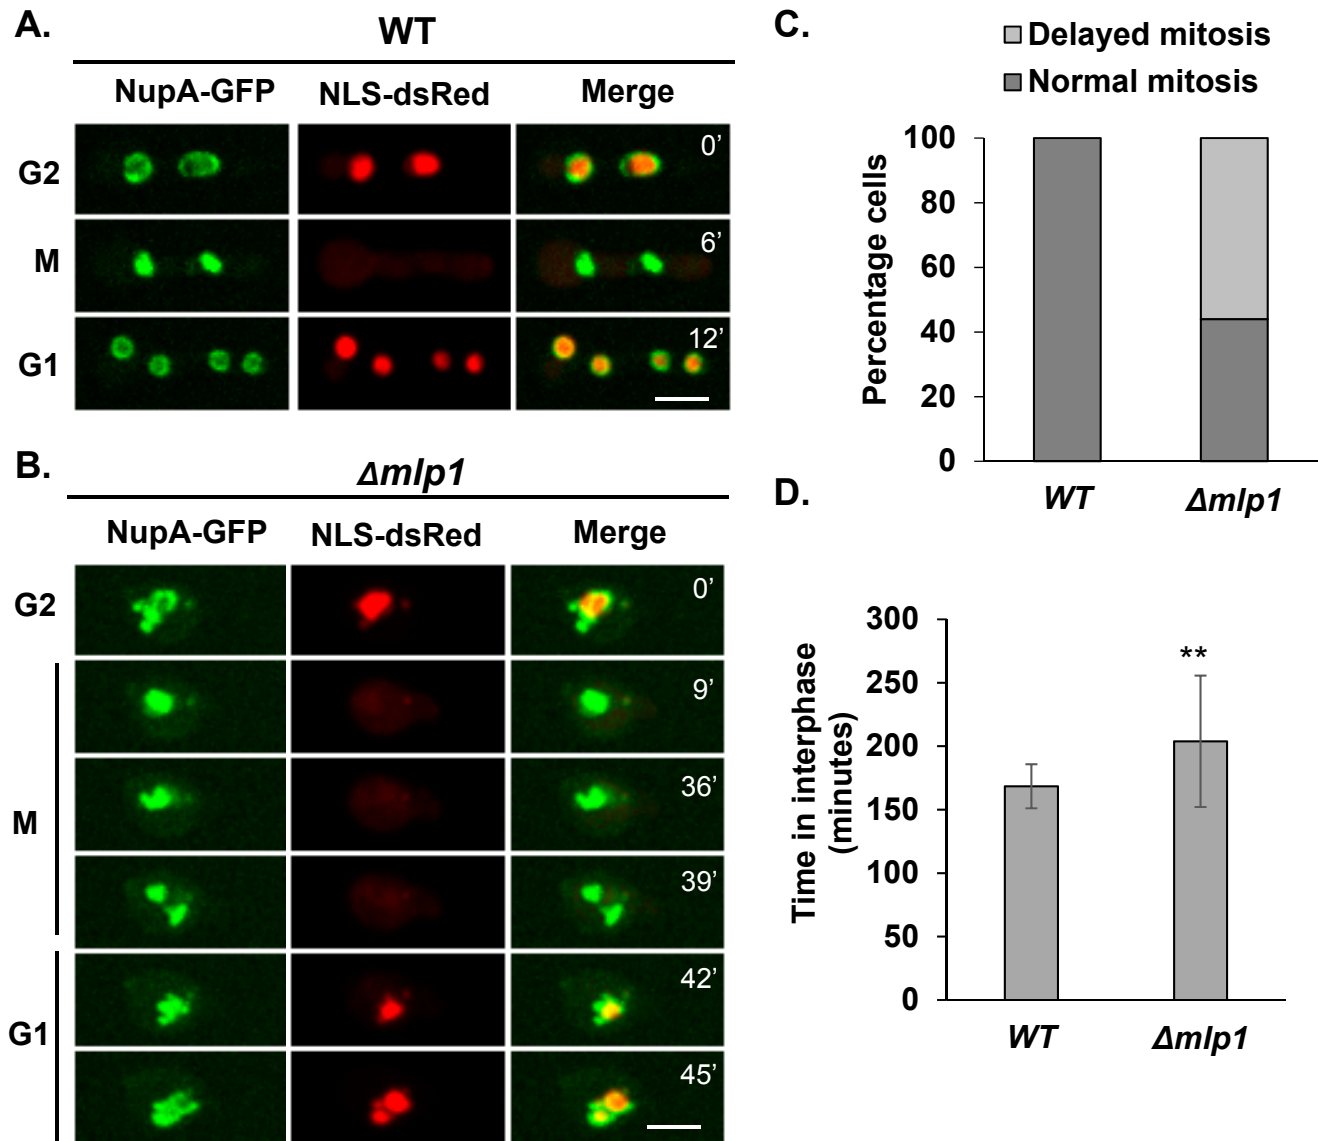

**Supplementary Figure S2. Mlp1 deletion causes interphase and mitotic delay.** (A) Imaging of NupA-GFP and NLS-dsRed during G2-M-G1 transitions in wildtype (SM86) and (B)  $\Delta mlp1$  cells (SGS250-H). (C) Percentage of cells displaying mitotic delay (greater than 10 minutes in mitosis was measured as delayed mitosis) in wildtype and  $\Delta mlp1$  cells measured by following NLS-dsRed (n = 70 mitosis). (D) Time spent in interphase in WT versus  $\Delta mlp1$  cells by following NLS-dsRed and recording the time between its mitotic dispersal from nuclei (n = 25 mitoses. p-value < 0.01). Scale bar, ~ 5 $\mu$ m.

## Supplementary Figure S3

A.

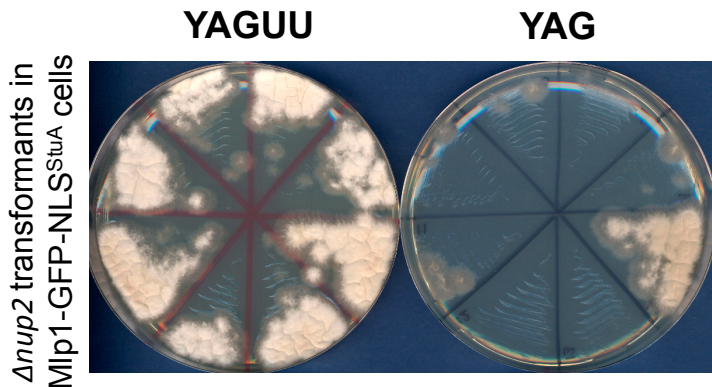

B.

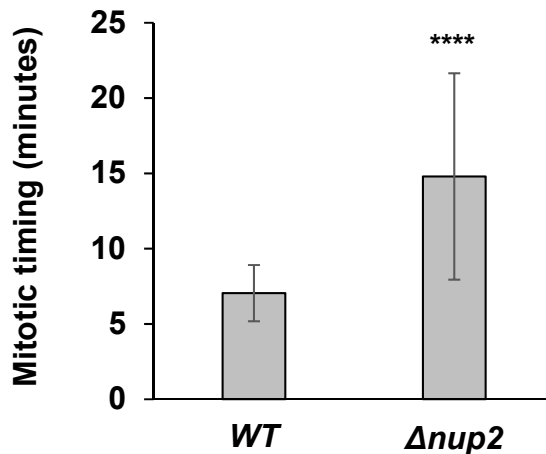

**Supplementary Figure S3. Retargeting Mlp1 to interphase NPCs does not rescue mitotic delay or the growth defects in  $\Delta nup2$  cells.** (A) Using the heterokaryon rescue technique (Osmani, Oakley, et al., 2006), Mlp1-GFP-NLS<sup>StuA</sup> was found to not complement Nup2 function. The one colony growing on selective media was a diploid. Heterokaryons form spontaneously when essential genes are deleted using a nutritional marker gene. When selection for the nutritional marker is imposed, nuclei carrying the essential gene deletion provide the nutritional marker function while the non-deleted nuclei provide the essential gene function. The heterokaryotic state is broken during the asexual cycle because all asexual spores contain a single nucleus. Growth of the uninucleated spores from heterokaryons on selective media therefore permits the growth of the null mutant to its terminal arrest phenotype but not the nuclei carrying the essential gene. Growth of the same spores on non-selective media allows the parent non-deleted spores to grow and form a colony. (B) Time in mitosis was measured in Mlp1-GFP-NLS<sup>StuA</sup> cells with or without Nup2 (n = 45 mitoses. p-value < 0.0001).

## Supplementary Figure S4

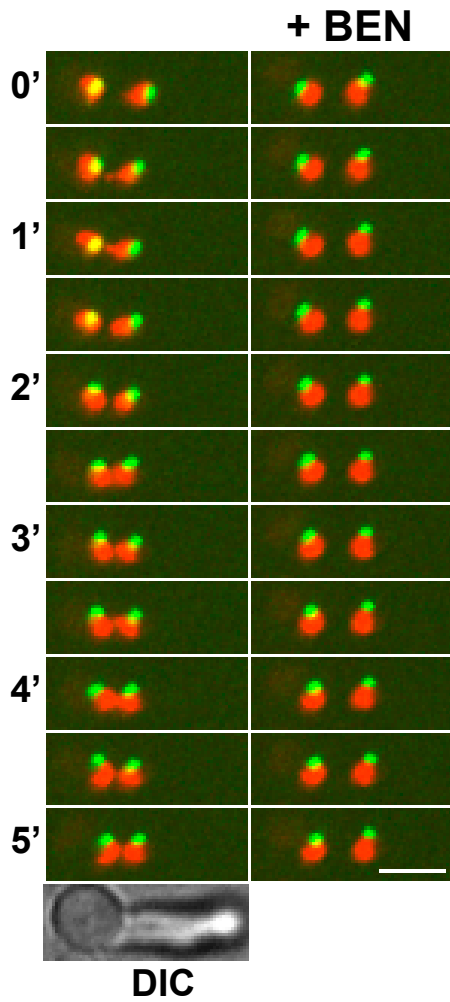

**Supplementary Figure S4. Ima1 foci formed in the absence of Nup2 remain after benomyl treatment to depolymerize microtubules.** Time-lapse microscopy of Ima1-GFP and NLS-dsRed in a  $\Delta nup2$  cell (SGS159-H) before treatment and after 15 minute treatment with 3 μg/ml benomyl (+BEN) as indicated. Scale bar, ~5 μm.

**Supplementary Table 1. *Aspergillus nidulans* strains used in this study**

| Strain     | Genotype                                                                                                                                              | Source background     |
|------------|-------------------------------------------------------------------------------------------------------------------------------------------------------|-----------------------|
| SGS90      | Mlp1::GFP::pyroA <sup>Af</sup> (pyroA4); pyrG89; wA3; fwA1;<br>chaA1; Δmus51::argB (argB2); SE15; nirA14                                              | SO451                 |
| SGS102     | Mlp1-GFP-pyroA <sup>Af</sup> (pyroA4); ΔyA::NLS-DsRed;<br>wA2?/wA3?; Δmus51::argB (argB2); pyrG89; fwA1?;<br>chaA1?; SE15                             | SGS91XCDS553          |
| SGS105 (H) | ΔnupA::pyrG <sup>Af</sup> (pyrG89); Mlp1-GFP-pyroA <sup>Af</sup> (pyroA4);<br>ΔyA::NLS-DsRed; Δmus51::argB (argB2); wA2?/wA3?;<br>fwA1?; chaA1?; SE15 | SGS102                |
| SGS121 (H) | Δnup2::pyrG <sup>Af</sup> (pyrG89); Mlp1-GFP-pyroA <sup>Af</sup> (pyroA4);<br>ΔyA::NLS-DsRed; Δmus51::argB (argB2); wA2?/wA3?;<br>fwA1?; chaA1?; SE15 | SGS102                |
| SGS159 (H) | Δnup2::pyrG <sup>Af</sup> (pyrG89); lma1-GFP::pyroA <sup>Af</sup> (pyroA4);<br>nimT23; ΔyA::NLS-DsRed ; ΔnkuA::argB (argB2?)                          | HA449                 |
| SGS193     | AN2226-GFP-pyroA <sup>Af</sup> (pyroA4); pyrG89; wA3; fwA1;<br>chaA1; Δmus51::argB (argB2); SE15; nirA14                                              | SO451                 |
| SGS197     | ΔyA::NLS-DsRed; pyrG89; pyroA4; Δmus51:: argB<br>(argB2); wA2/wA3; fwA1?; chaA1?; sE15                                                                | (Suresh et al., 2017) |
| SGS206     | AN5694-GFP-pyroA <sup>Af</sup> (pyroA4?); ΔyA::NLS-DsRed;<br>pyrG89; Δmus51::argB (argB2); wA2/wA3; fwA1?;<br>chaA1?; SE15                            | SGS185XCDS553         |

|            |                                                                                                                                                                                |               |
|------------|--------------------------------------------------------------------------------------------------------------------------------------------------------------------------------|---------------|
| SGS212     | AN2226-GFP-pyroA <sup>Af</sup> (pyroA4?); ΔyA::NLS-DsRed;<br>pyrG89; Δmus51::argB (argB2); wA2/wA3; fwA1?;<br>chaA1?; SE15; nirA14                                             | SGS193XCDS553 |
| SGS250 (H) | Δmlp1::pyrG <sup>Af</sup> (pyrG89); NupA-GFP::pyroA <sup>Af</sup> (pyroA4);<br>nimT23; Δmus51::argB; ΔyA::NLS-DsRed-StuA                                                       | SM86          |
| SGS263 (H) | Δnup2::pyrG <sup>Af</sup> (pyrG89); AN2226-GFP-pyroA <sup>Af</sup><br>(pyroA4?); ΔyA::NLS-DsRed; Δmus51::argB (argB2);<br>wA2/wA3; fwA1?; chaA1?; SE15; nirA14                 | SGS212        |
| SGS282     | Md2A-GFP::pyroA <sup>Af</sup> (pyroA4?); ΔyA::NLS-DsRed;<br>pyrG89; ΔnKuA <sup>Ku70</sup> ::argB (argB2); SE15?; nirA14?;<br>wA2/3?; fwA1?; chaA1?                             | CDS553XCDS634 |
| SGS285 (H) | Δnup2::pyrG <sup>Af</sup> (pyrG89); Md2A-GFP::pyroA <sup>Af</sup><br>(pyroA4?); ΔyA::NLS-DsRed; ΔnKuA <sup>Ku70</sup> ::argB (argB2);<br>SE15?; nirA14?; wA2/3?; fwA1?; chaA1? | SGS282        |
| SGS287 (H) | ΔnupA::pyrG <sup>Af</sup> (pyrG89); Md2A-GFP::pyroA <sup>Af</sup><br>(pyroA4?); ΔyA::NLS-DsRed; ΔnKuA <sup>Ku70</sup> ::argB<br>(argB2); SE15?; nirA14?; wA2/3?; fwA1?; chaA1? | SGS282        |
| SGS290 (H) | Δnup2::pyrG <sup>Af</sup> (pyrG89); AN5694-GFP-pyroA <sup>Af</sup><br>(pyroA4?); ΔyA::NLS-DsRed; Δmus51::argB (argB2);<br>wA2/wA3; fwA1?; chaA1?; SE15                         | SGS206        |
| SGS306 (H) | Δnup2::pyrG <sup>Af</sup> (pyrG89); Mlp1-GFP-StuANLS::pyroA <sup>Af</sup><br>(pyroA4); ΔyA::NLS-DsRed; Δmus51:: argB(argB2);<br>wA2/wA3; fwA1?; chaA1?; sE15                   | SGS311        |

|           |                                                                                                                                                       |                                   |
|-----------|-------------------------------------------------------------------------------------------------------------------------------------------------------|-----------------------------------|
| SGS311    | Mlp1-GFP-StuANLS::pyroA <sup>Af</sup> (pyroA4); pyrG89;<br>ΔyA::NLS-DsRed; Δmus51:: argB (argB2); wA2/wA3;<br>fwA1?; chaA1?; sE15                     | SGS197                            |
| SGS337    | Nup2ΔIABDΔRBD-CR-pyrG <sup>Af</sup> (pyrG89);<br>Mlp1::GFP::pyroA <sup>Af</sup> (pyroA4); wA3; fwA1; chaA1;<br>Δmus51::argB (argB2); SE15; nirA14     | SGS90                             |
| SGS340    | Nup2ΔIABDΔRBD-CR-pyrG <sup>Af</sup> (pyrG89); AN2226-GFP-<br>pyroA <sup>Af</sup> (pyroA4); wA3; fwA1; chaA1; Δmus51::argB<br>(argB2); SE15; nirA14    | SGS193                            |
| SM86      | pyrG89 ΔyA::StuA-NLS-DsRed; nimT23; pyroA4<br>Δmus51::argB; nupA-GFP::pyroA <sup>Af</sup>                                                             | (Markossian et al.,<br>2015)      |
| SM106 (H) | ΔnupA::pyrG <sup>An</sup> ; Ima1-GFP::pyroA <sup>Af</sup> ; nimT23;<br>ΔyA::NLS-DsRed-StuA; pyrG89; (pyroA4; argB2?);<br>ΔnkuA <sup>ku70</sup> ::argB | HA449                             |
| HA449     | Ima1-GFP::pyroA <sup>Af</sup> ; nimT23; ΔyA::NLS-DsRed;<br>pyrG89; (pyroA4; argB2?) ; ΔnkuA::argB                                                     | (Liu et al., 2015)                |
| SGS91     | Mlp1::GFP::pyroA <sup>Af</sup> (pyroA4); pyrG89; wA3; fwA1;<br>chaA1; Δmus51::argB (argB2); SE15; nirA14                                              | SO451                             |
| CDS553    | ΔyA::NLS-DsRed; argB2; wA2                                                                                                                            | AY02                              |
| SO451     | pyrG89; pyroA4; wA3; fwA1; chaA1; Δmus51::argB<br>(argB2); SE15; nirA14                                                                               | (Osmani, Davies, et al.,<br>2006) |
| SGS185    | AN5694-GFP-pyroA <sup>Af</sup> (pyroA4); pyrG89; wA3; fwA1;<br>chaA1; Δmus51::argB (argB2); SE15; nirA14                                              | SO451                             |



|        |                                                                                                                         |                                                       |
|--------|-------------------------------------------------------------------------------------------------------------------------|-------------------------------------------------------|
| SGS193 | AN2226-GFP-pyroA <sup>Af</sup> (pyroA4); pyrG89; wA3; fwA1;<br>chaA1; Δmus51::argB (argB2); SE15; nirA14                | SO451                                                 |
| CDS634 | Md2A-GFP::pyroA <sup>Af</sup> (pyroA4); ΔnKuA <sup>Ku70</sup> ::argB<br>(argB2); pyrG89; sE15; nirA14; wA3; fwA1; chaA1 | (De Souza et al., 2009)                               |
| AY02   | pyrG89; pyroA4; ΔyA:NLS-DsRed; ΔnKuA::argB;<br>(argB2)                                                                  | (Shen, Osmani,<br>Govindaraghavan, &<br>Osmani, 2014) |

Some nutritional and color markers could be covered by, or be recessive to, other markers in the strain and are designated by a question mark.

<sup>Af</sup> represents genes from *A. fumigatus* used for complementation of the corresponding *A. nidulans* nutritional mutations.

(H) Represents a heterokaryon.

**Supplementary Table 2. Primers used in this study**

| <b>Oligo</b> | <b>Sequence</b>                                     |
|--------------|-----------------------------------------------------|
| GS15         | CTGTTCCAGCCTCGTCTTCC                                |
| GS16         | CCAACTCCAACCTCCTGCACC                               |
| GS28         | GGCTCCAGCGCCTGCACCAGCTCCGCCGGCACCCTTCTAGCAA         |
| GS29         | CATTTATCGAGACAACAGTACAGCACCCGC                      |
| GS30         | GCGGGTGCTGTACTGTTGTCTCGATAAATGCGTGCTGGCACACCGTCC    |
| GS31         | GGCTCCAGCGCCTGCACCAGCTCCCTTTTGAGCGTCTCCATCGG        |
| GS51         | TGGCATGGATGAACTATACAAACGCTACGGCCAAGGCACCGTTG        |
| GS52         | GAAGAGCATTGTTTGAGGCGTTAACGACGAGCACTTATCAGACTGCC     |
| GS59         | GGAGAGGCTAGAGGCAAGTG                                |
| GS60         | TGGACTTGGTGCAGGCTCAG                                |
| GS61         | GGCTCCAGCGCCTGCACCAGCTCCAGCCCCTCGTCGAGCACGCTTGTT    |
| GS62         | GCATCAGTGCCTCCTCTCAGACAGTTGCTGTCTTCAGAGATACAC       |
| GS63         | CAATCGTCTTGTCCACATCC                                |
| GS64         | CAGATGCAGTATGCCAGAAG                                |
| GS83         | GATCTTGTCTCCTCTCCAC                                 |
| GS84         | TGCCTGTTATCGTGTCTGGTG                               |
| GS85         | GGCTCCAGCGCCTGCACCAGCTCCGCTGACCGCGATGAGCCCTT        |
| GS86         | GCATCAGTGCCTCCTCTCAGACAGATCTAGCAGTTAAGTGATGGCATAACG |
| GS87         | CGCCTTCTGTTCAATCATCG                                |
| GS88         | CTTCTCGAAGGTTTCGCGGCA                               |

|       |                                                              |
|-------|--------------------------------------------------------------|
| GS95  | AGGAAGAGTGCGGCTAGCTG                                         |
| GS101 | TTTGTATAGTTCATCCATGCCATGTGTAATCCC                            |
| GS102 | GGGATTACACATGGCATGGATGAACTATACAAACGCTACGGCCAAGGCACCGT<br>TG  |
| GS105 | CACACAGGCCAAGGTGACACA                                        |
| GS106 | GACACCTAAGCCTTCGCCAG                                         |
| GS107 | CGCCTTGATTATCTACCGTG                                         |
| GS108 | CGGTTGTTGAGCAAGAGATG                                         |
| GS111 | GCAGCACCAAGCTTCTGAATC                                        |
| GS112 | GGCCGGTGGATGCATTAGTG                                         |
| JD143 | CAGAAATATGACCGAGTGGACCCAGCTCAG                               |
| JD144 | AGATCCCCGTGTATGACCACCACCGCGCATC                              |
| JD145 | GATGCGCGGTGGTGGTCATACACGGGGATCTGGAGCTGGTGCAGGCGCTGG<br>AGCCG |
| JD146 | CACATTCCAATGCAAAATGCAGCTTGCCACCTGTCTGAGAGGAGGCACTGATG<br>C   |
| JD147 | GTGGCAAGCTGCATTTTGCATTGGAATGTG                               |
| JD148 | GCCATATCATGTCCCGTTAGCAGGTTGTTC                               |
| JD151 | AGGACGTCATGTTGAAGTACCCCATAGCG                                |
| JD152 | GTTGAACTTAAATAGATCAGTGTCTTATCC                               |
| JD153 | GGATAAGGACACTGATCTATTTAAGTTCAAC-CGCCTCAAACAATGCTCTTC         |
| JD154 | GCCGGTGGATGCATTAGTGATGAAGACTGT-<br>CTGTCTGAGAGGAGGCACTGATGC  |

|       |                                                           |
|-------|-----------------------------------------------------------|
| JD155 | ACAGTCTTCATCACTAATGCATCCACCGGC                            |
| JD156 | TATCAAGGAGATCCGCGCTTTTCGCTACTCG                           |
| JD163 | GTTGACGAAAGTACAGTAGCCAGCACGG                              |
| JD164 | TGAACTGAGTGAGAAGGTCGTCAAACGC                              |
| JD240 | AACGCCTGAACATAGCCTTGGTCATTTGCC                            |
| JD241 | TGCTTTGAAAATTCCAACCTACAGCCAG                              |
| JD242 | TCCTGGCTGTAGGTTGGAATTTTCAAAGCACGCCTCAAACAATGCTCTTC        |
| JD243 | CACATTCCAATGCAAATGCAGCTTGCCACCTGTCTGAGAGGAGGCACTGATG<br>C |
| JD147 | GTGGCAAGCTGCATTTTGCATTGGAATGTG                            |
| JD244 | CGCAGCTCTCCGATACTGATAGCTTCATAG                            |
| JD336 | CGCTCATTCCCTACCCCAGTAGATTG                                |
| JD337 | ACGAACTTTGCCGGTGATGACATGC                                 |
| SM36  | GGTATGTTGTGCGCACTTGGA                                     |
| SM39  | CGCTTACAGAACTACCAACC                                      |
| SM40  | GAAGAGCATTGTTTGTAGGCGTCTGACTGTATATTTGTGTTTGCGC            |
| SM42  | GCATCAGTGCCTCCTCTCAGACAGTAGAGTGTCGTGGTTTTTGTACAT          |
| LU233 | CGCCTCAAACAATGCTCTTC                                      |
| FN01  | CTGTCTGAGAGGAGGCACTGATGC                                  |

**Supplementary Table 3. Importin  $\alpha/\beta$  interacting proteins.** Table showing the chosen importin  $\alpha/\beta$  interacting proteins, their predicted orthologues in yeast, the number of unique peptides identified by mass spectrometry and the % sequence coverage.

| Purified protein  | Co-purifying protein | Orthologues ( <i>S. cerevisiae</i> - <i>S. pombe</i> ) | Length (aa) / Size (kDa) | Unique peptides in interphase (% sequence coverage) |
|-------------------|----------------------|--------------------------------------------------------|--------------------------|-----------------------------------------------------|
| Importin $\alpha$ | AN2226 (Tho2)        | Tho2-Tho2                                              | 2429 / 269.5             | 23 (13)                                             |
| Importin $\alpha$ | AN5694 (CutB)        | TRF5-Cid14                                             | 694 / 77.7               | 7 (17)                                              |
| Importin $\beta$  | AN5694 (CutB)        | TRF5-Cid14                                             | 694 / 77.7               | 4 (11)                                              |

**Supplementary Movie S1.**  $\Delta nupA$  cell expressing Mlp1-GFP and NLS-DsRed going through mitosis. Images were collected every 8 minutes.
